## **Sexual imprinting and speciation in two *Peromyscus* species**

E.K. Delaney<sup>1,2</sup> and H.E. Hoekstra<sup>1</sup>

<sup>1</sup>Department of Organismic and Evolutionary Biology, Department of Molecular and Cellular Biology, Museum of Comparative Zoology, Howard Hughes Medical Institute, Cambridge MA 02138 USA Email: [hoekstra@oeb.harvard.edu](mailto:hoekstra@oeb.harvard.edu)

<sup>2</sup>Current address: Department of Evolution and Ecology, University of California, Davis CA 95616 USA

**KEYWORDS:** deer mice, mate choice, mosaic sympatry, reproductive isolation, sexual isolation

1 **ABSTRACT**

2           Sexual isolation, a reproductive barrier, can prevent interbreeding between diverging  
3 populations or species. Sexual isolation can have a clear genetic basis; however, it may also  
4 result from learned mate preferences that form via sexual imprinting. Here, we demonstrate that  
5 two sympatric sister species of mice—the white-footed mouse (*Peromyscus leucopus*) and its  
6 closest relative, the cotton mouse (*P. gossypinus*)—hybridize only rarely in the wild despite co-  
7 occurring in the same habitat and lack of any measurable intrinsic postzygotic barriers in  
8 laboratory crosses. We present evidence that strong conspecific mate preferences in each species  
9 form significant sexual isolation. We find that these mating preferences are learned in one  
10 species but may be genetic in the other: *P. gossypinus* sexually imprints on its parents, but innate  
11 biases or social learning affects mating preferences in *P. leucopus*. Our study demonstrates that  
12 sexually imprinting contributes to reproductive isolation that reduces hybridization between  
13 otherwise inter-fertile species, supporting a previously underappreciated role for learning in  
14 mammalian speciation.

## 15 INTRODUCTION

16 Sexual isolation, when divergent mating preferences limit or prevent interbreeding  
17 between individuals from different populations, is a prevalent premating reproductive barrier that  
18 may be vital to early stages of speciation. Comparative studies in fruit flies (Coyne and Orr 1989,  
19 1997) and darter fish (Mendelson 2003) have shown that sexual isolation accumulates rapidly  
20 among young species relative to postzygotic reproductive barriers (e.g., hybrid sterility and  
21 inviability). Sexual isolation also can significantly reduce interbreeding among incipient  
22 sympatric species pairs (Coyne and Orr 1997; Noor 1997; Ramsey et al. 2003; Boughman et al.  
23 2005; Nosil 2007; Matsubayashi and Katakura 2009), suggesting that it either allows species to  
24 co-exist or is selected via the process of reinforcement. In a few cases, sexual isolation is the sole  
25 reproductive barrier preventing hybridization between sympatric species, indicating that sexual  
26 isolation alone can be strong enough to inhibit hybridization and maintain genetic differentiation  
27 (e.g., Seehausen 1997; Fisher et al. 2006). Yet, despite the important role that sexual isolation  
28 can play among incipient species, its mechanistic basis—whether mating preference is genetic or  
29 learned—is often unknown.

30 Sexual isolation forms when mating traits and preferences diverge among populations,  
31 suggesting that sexual isolation should evolve when genetic loci for mating traits and preferences  
32 become linked (Felsenstein 1981). This scenario is a “two allele mechanism” of reproductive  
33 isolation, in which divergent alleles for trait and preference loci must fix between a pair of  
34 populations. As this mode of sexual isolation can break down due to recombination, linkage  
35 disequilibrium (particularly when caused by physical linkage) can promote sexual reproductive  
36 barriers. For example, plumage and plumage preferences are both sex-linked in finches and  
37 flycatchers and thus reduce hybridization between alternate color morphs (Pryke 2010) and

38 congener species (Saether et al. 2007), respectively. Alternatively, the issue of recombination  
39 could be circumvented if the loci for mating traits and preferences were under the same genetic  
40 control (i.e., pleiotropy). Pleiotropic genes undergoing divergent natural selection can also cause  
41 non-random mating and thus behave as “magic traits”. Although several examples of magic traits  
42 (e.g., Jiggins et al. 2001; Mckinnon et al. 2004; Bradshaw & Schemske 2003) suggest they may  
43 not be as rare as previously thought (Servedio et al. 2011), the putative “magic” genes remain  
44 elusive. In either of these scenarios, a minimum of two alleles must be present and fixed in each  
45 population, requiring selection or drift in opposite directions in each species (Felsenstein 1981).

46         Sexual imprinting, the process of learning to prefer parental traits at a young age, is an  
47 alternate mechanism for establishing sexual isolation that arguably can be more efficient at  
48 establishing reproductive isolation than the above-mentioned genetic mechanisms. Sexual  
49 imprinting is immune to genetic recombination because learned mating preferences are  
50 automatically “inherited” with a given trait locus. Thus, sexual imprinting is considered a “one-  
51 allele mechanism” of reproductive isolation because the same “sexual imprinting allele” (e.g., an  
52 ability to learn parental traits) could result in assortative mating that reduces interbreeding  
53 between divergent populations, thereby reducing the number of steps required to achieve sexual  
54 isolation. An example of one-allele assortative mating locus has been localized in the *Drosophila*  
55 genome (Ortíz-Barrientos and Noor 2005). In addition to needing only one allele at a learning  
56 locus, several theoretical models have shown that learned mating preferences will maintain  
57 sexual isolation much longer in populations experiencing gene flow than if mating preferences  
58 had a genetic basis (Laland 1994; Verzijden et al. 2005). Often, sexual imprinting will maintain  
59 reproductive isolation in the face of gene flow because it lowers the amount of divergent natural  
60 selection needed to isolate groups (Verzijden et al. 2005). Sexual imprinting may also enhance

61 sexual isolation in sympatry through reinforcement (Servedio et al. 2009). Finally, if sexual  
62 imprinting is asymmetric—cases in which offspring prefer even more extreme versions of the  
63 traits on which they imprinted—it may even facilitate divergence by creating a bias and thereby  
64 selection for more divergent mating traits (ten Cate et al. 2006).

65         While sexual imprinting has long been recognized as a phenomenon that occurs within  
66 species, its impact on speciation has become appreciated only recently (Irwin and Price 1999). It  
67 is a phenomenon that occurs in species with parental care, and has been documented in over 15  
68 orders of birds (ten Cate and Vos 1999) as well as some mammals (Kendrick et al. 1998) and  
69 fish (Verzijden and ten Cate 2007; Kozak and Boughman 2009; Verzijden and Rosenthal 2011).  
70 A few empirical studies have explicitly tested for a connection between sexual imprinting and  
71 sexual isolation between closely related populations or species. For example, benthic and  
72 limnetic sticklebacks sexually imprint paternal cues under ecologically divergent selection,  
73 which results in significant sexual isolation between the two morphs (Kozak et al. 2011). Other  
74 studies in cichlids (Verzijden and ten Cate 2007), great and blue tits (Slagsvold et al. 2002), and  
75 Darwin’s finches (Grant and Grant 1997) have demonstrated that sexual imprinting can maintain  
76 sexual isolation. Therefore, sexual imprinting seems to be a key, but underexplored, avenue to  
77 speciation.

78         Here we assess the role of sexual imprinting in generating reproductive isolation  
79 between two mammalian species, the white-footed mouse (*Peromyscus leucopus*) and the cotton  
80 mouse (*P. gossypinus*), which are thought to have diverged during the Pleistocene (Blair 1950).  
81 *P. leucopus* is distributed across the Midwest and eastern United States, whereas *P. gossypinus* is  
82 restricted to the Southeast (Figure 1); their ranges overlap in the Gulf Coast states, from Texas to  
83 Virginia. These species show some level of sexual isolation: *P. leucopus* and *P. gossypinus*

84 hybridize and produce viable, fertile offspring in the lab (this study, Dice 1937, 1940); however,  
85 when multiple mice of each species are placed in large arenas, both species mate with  
86 conspecifics (Bradshaw 1965, 1968). While assortative mating in laboratory studies is potentially  
87 strong, there is mixed evidence as to whether it is strong enough to prevent hybridization in wild  
88 sympatric populations (Dice 1940, Howell 1921, McCarley 1954).

89 In this study, we used genomic data to first assess hybridization in the wild and  
90 conclusively found that the two species remain genetically distinct in sympatry despite rare  
91 hybridization events. We then examined the degree of sexual isolation between *P. leucopus* and  
92 *P. gossypinus*, and tested if it had a learned or genetic basis. Our results show that sexual  
93 imprinting produces strong sexual isolation between these sister species, and we suggest that  
94 learning disproportionately contributes to the total reproductive isolation we have observed in  
95 between two inter-fertile, sympatric species.

96

## 97 **METHODS**

### 98 **Detection of hybrids in sympatric populations**

#### 99 *Wild samples*

100 During April 2008 and January-February of 2010 and 2011, we collected mice from seven  
101 allopatric locations and 13 sympatric locations (Figure 1). At each location, we placed up to 300  
102 Sherman traps every 20 feet in transects of 50 traps per line. From each mouse captured, we took  
103 liver or tail tissue and stored tissues in 100% ethanol for subsequent DNA extraction. We  
104 augmented our own sampling with tissues collected at additional sites from museum specimens  
105 at the Harvard Museum of Comparative Zoology, Oklahoma State University Collection of  
106 Vertebrates, Sam Noble Museum of Natural History, and the Museum of Texas Tech University.

107 Precise collecting locations and sample sizes for all animals included in this study are provided  
108 in Supplementary Table 1.

109

110 *Lab strains*

111 We obtained *P. leucopus* animals from the *Peromyscus* Genetic Stock Center (University  
112 of South Carolina). The line was originally established with 38 founders brought into the lab  
113 during 1982-1985. In 2009, we established a breeding colony of *P. gossypinus* animals with 18  
114 founders caught in Jackson and Washington counties in Florida. In captivity, both breeding  
115 colonies have been have been deliberately outbred to preserve genetic diversity.

116 All animals were housed in standard mouse cages in either mate pairs (one female and  
117 one male) or in same sex cages with a maximum of five adults. Offspring were weaned into same  
118 sex cages 23 days after birth. We set the light cycle to 14 hours of light and 10 hours of dark and  
119 maintained a room temperature between 70 and 77 degrees Fahrenheit. All mice were fed a  
120 regular Purina diet (Purina Iso Pro 5P76) *ad libitum*.

121 In addition to maintaining these two species strains, we also bred hybrids in the  
122 laboratory. First generation hybrids (F1) were generated from both *P. gossypinus* female x *P.*  
123 *leucopus* male matings as well as the reciprocal cross. Next, these F1 hybrids were backcrossed  
124 to either *P. gossypinus* or *P. leucopus*.

125

126 *ddRADseq library construction and genotyping*

127 We extracted genomic DNA from 374 wild-caught individuals and two lab-raised hybrids  
128 using an Autogen kit and AutoGenprep 965 instrument. We prepared double digest restriction-  
129 associated DNA tag (ddRAD) libraries from each individual following the protocol described in

130 Peterson et al. (2012). Briefly, we digested 100-200 ng of DNA from every individual with two  
131 restriction enzymes, EcoRI-HF and MspI (New England Biolabs) and purified the reactions with  
132 AMPure XP beads (Beckman Coulter Genomics). After quantifying the cleaned and digested  
133 product on a spectrophotometer plate reader (SpectraMax Gemini XS Plate Reader), we ligated  
134 approximately 50 ng of digested DNA to uniquely barcoded EcoRI adapters and MspI adapters  
135 in a 40  $\mu$ l reaction volume with T4 DNA ligase (New England Biolabs). We pooled equal  
136 amounts of 48 ligated samples and used two rounds of AMPure XP bead purification to reduce  
137 the total pooled volume of up to 30  $\mu$ l. We loaded each ligation pool onto a 2% agarose Pippin  
138 Prep cassette (Sage Science) and selected fragments with a size of  $300 \pm 35$  bp. We ran five  
139 replicate Phusion PCRs according to the Finnzyme kit directions (Thermo Scientific) for 12  
140 cycles with 5  $\mu$ l of eluted Pippin Prep product as template. Each PCR was indexed using a  
141 unique reverse primer (primer and index sequences from Peterson et al. 2012). Following PCR,  
142 we pooled all replicate reactions and purified them with AMPure XP beads to concentrate each  
143 ddRAD library. We multiplexed ddRAD libraries in equimolar ratios and sequenced 50 bp single  
144 reads on an Illumina Genome Analyzer II or HiSeq (2000 or 2500).

145 We demultiplexed reads and aligned them by sample to the draft genome sequence of  
146 *Peromyscus maniculatus* (NCBI: GCA\_000500345.1) with STAMPY run in hybrid mode using  
147 the BWA mem algorithm with default parameters (Lunter and Goodson 2011). We identified and  
148 removed adapter sequences with Picard-tools 1.100 (<http://picard.sourceforge.net>). We realigned  
149 potential indels with the Genome Analysis Tool Kit v. 3.2-2 IndelRealigner (GATK; McKenna  
150 et al. 2010) and performed SNP discovery across all samples simultaneously using the GATK  
151 UnifiedGenotyper (DePristo et al. 2011). We filtered alignments, keeping regions with 100 or  
152 more total reads and an average base quality greater than 20. We retained bi-allelic SNPs with a



153 minimum mapping quality of 30 that were present in at least 90% of our individuals at a depth of  
154 10 or greater. To reduce linkage among SNPs in our dataset, we identified “clusters” of SNPs  
155 within 100 bp of each other and more than 100 bp from another SNP and we randomly selected  
156 one SNP per cluster. Our final dataset contained 3,707 SNPs and 321 mice that had over 90% of  
157 genotypes present at these SNPs. Of these mice, 21 *P. leucopus* were caught at allopatric sites or  
158 lab-raised, 54 *P. gossypinus* were caught in allopatric sites or lab-raised, two individuals were  
159 hybrids from our colonies, and 244 individuals were of unknown ancestry from the predicted  
160 sympatric species range. Short read data were deposited in GenBank (accession number:  
161 SRPXXXXXX).

162

### 163 *Identification of hybrids*

164 We used genetic principal component analysis (PCA) to evaluate admixture between *P.*  
165 *leucopus* and *P. gossypinus*. We implemented genetic PCA using smartpca from the Eigensoft  
166 6.0.1 package (Patterson et al. 2006) and output the first ten eigenvectors. After excluding outlier  
167 individuals and SNPs, our final dataset contained 288 individuals and 2,528 SNPs. We expected  
168 the first principal component to separate genetic differences between species and included  
169 known individuals from each species (allopatric and identified museum specimens) to identify  
170 PC1 values corresponding to each species. We assessed the eigenvector significance using  
171 Tracy-Widom statistics (Patterson et al. 2006) implemented using twstats in Eigensoft 6.0.1.

172

### 173 **Measurement of sexual isolation between species**

174 Using lab-based assays, we first tested for intrinsic postzygotic isolation and then  
175 estimated sexual isolation without mate choice. We could then compare our sexual isolation

176 estimate from no-choice assays to those with mate choice to quantify the contribution of mating  
177 preferences to reproductive isolation between *P. leucopus* and *P. gossypinus*.

178

179 *Intrinsic postzygotic isolation and sexual isolation without choice*

180 We tested for intrinsic postzygotic sexual isolation and sexual isolation between lab-  
181 raised *P. leucopus* and *P. gossypinus* using no-choice trials. We set up 20 crosses for each  
182 conspecific and heterospecific pairing: L♀ x L♂, G♀ x G♂, L♀ x G♂, and G♀ x L♂ (in which  
183 “L” represents *P. leucopus* and “G” represents *P. gossypinus*). When F1 offspring were  
184 produced, we used these mice as F1 hybrids in additional no-choice trials in backcross mating  
185 pairs: F1♀ x L♂, F1♀ x G♂, L♀ x F1♂, and G♀ x F1♂. We avoided any sib-sib or sib-parent  
186 pairings.

187 We set up mating pairs by adding a sexually receptive virgin female to the cage of a  
188 virgin, sexually mature male. We determined female sexual receptivity through vaginal lavage  
189 and considered a female to be receptive between proestrus and estrus stages. We gave pairs 60  
190 days to produce a litter, which is approximately 12 estrous cycles (mean estrous cycle length for  
191 both species is 5-6 days; Dewsbury et al. 1977) or opportunities for successful reproduction. We  
192 considered the production of offspring as a successful mating event and inferred the latency to  
193 the first successful mating by subtracting the average gestation period—23 days in both species  
194 (Pournelle 1952; Wolfe and Linzey 1977; Lackey et al. 1985)—from the total number of days  
195 until a litter was born. Although our metric for mating success is conservative because it is  
196 confounded with any fertility differences that might exist among individuals or between the  
197 species, our assay nonetheless captures hybridization between these species.

198           We first used the no-choice assays to test hybrid viability and fertility in our laboratory  
199 strains of *P. leucopus* and *P. gossypinus*. We scored offspring survival to reproductive age in  
200 heterospecific crosses ( $L_{\text{♀}} \times G_{\text{♂}}$ ,  $G_{\text{♀}} \times L_{\text{♂}}$ ), and then used these F1 hybrids in backcrosses to  
201 look for evidence of reduced fertility relative to conspecific crosses. To compare the proportion  
202 of successful mating events between conspecific and heterospecific crosses, we used a logistic  
203 regression to quantify the effects of the female species, male species, or the interaction between  
204 female and male species. We then selected the best-fit model based on the lowest Akaike  
205 Information Criterion (AIC). We compared the 95% confidence intervals for the mean mating  
206 success among backcross pairs ( $F1_{\text{♀}} \times L_{\text{♂}}$ ,  $F1_{\text{♀}} \times G_{\text{♂}}$ ,  $L_{\text{♀}} \times F1_{\text{♂}}$ ,  $G_{\text{♀}} \times F1_{\text{♂}}$ ) to those of  
207 conspecific crosses. Together, these no-choice data provide an estimate of hybrid viability and  
208 relative fertility.

209           We next tested for differences in mating latency between conspecific, heterospecific, and  
210 backcross mating pairs using a non-parametric Kruskal-Wallis rank sum test followed by  
211 pairwise Wilcoxon tests with adjusted Bonferroni-corrected p-values. To quantify sexual  
212 isolation, we counted the number of successful mating events to estimate a joint isolation index,  
213  $I_{\text{PSI}}$  (Rolán-Alvarez and Caballero 2000), which compares observed to expected mating events  
214 (assuming random mating among individuals) among conspecific and heterospecific pairs. This  
215 index ranges from -1 (all mating occurred between species) to +1 (all mating occurred within  
216 species), with a value of 0 indicating equal mating among pair types. We used the number of  
217 conspecific and heterospecific pairs that produced litters to estimate  $I_{\text{PSI}}$  in JMATING v. 1.0.8  
218 (Carvajal-Rodriguez and Rolán-Alvarez 2006). We used 10,000 bootstrap replicates to estimate  
219 the isolation indices, their standard deviation, and to test the hypothesis that our estimates of the  
220 joint isolation deviated significantly from a null hypothesis of random mating.

221

222 *Sexual isolation with choice*

223         We contrasted our estimate of the sexual isolation index ( $I_{PSI}$ ) from no-choice assays to  
224 the sexual isolation index estimated from two-way choice assays. We measured conspecific  
225 mating preferences in a two-way electronically-controlled gated mate choice apparatus that  
226 consisted of three collinear rat cages, with each pair of cages separated by two RFID antennae  
227 and gates (FBI Science GmbH; Figure 3A). Each pair of gates was programmed to allow passage  
228 depending on the identity of the mouse. Specifically, for each trial we implanted three mice with  
229 small transponders (1.4 mm x 9 mm, ISO FDX-B, Planet ID GmbH) in the interscapular region  
230 using a sterile hypodermic implanter and programmed the gates to allow the designated  
231 “chooser” mouse (i.e. the individual whose preference we tested) to pass freely through all cages  
232 while constraining each “stimulus” mouse to the left or right cage, respectively.

233         With this apparatus, we tested mate preferences of males and females of each species for  
234 conspecific and heterospecific stimuli of the opposite sex. We allowed the chooser mouse—  
235 either a sexually receptive virgin female (in proestrus or estrus as determined by vaginal lavage)  
236 or a sexually mature virgin male—to acclimate to the apparatus for one day, adding food, water,  
237 used nesting material, and a hut from each stimulus mouse’s colony housing cage to the flanking  
238 cages of the apparatus. Approximately 24 hours later, we returned the chooser mouse to the  
239 center cage if it had not already nested there, closed all gates, and added stimulus mice to the two  
240 flanking cages to allow them two to four hours to acclimate to their new environment. At lights  
241 out (4:00 pm; 14:10 hour light:dark cycle), we re-opened the gates and recorded RFID readings  
242 at all antennae as well as webcam video streams from each flanking cage for two nights (~44  
243 hours; camera model: DLINK DCS-942L). Each chooser mouse was tested once.

244           At the end of each trial, we parsed a log file of RFID readings and calculated chooser  
245 preference for a stimulus as the proportion of time spent with that stimulus divided by the time  
246 spent with both stimuli (i.e. a ratio of association time between the stimuli). We analyzed only  
247 trials in which the chooser mouse investigated both cages during the acclimation, spent at least  
248 10 minutes investigating at least one stimulus during the trial, and the stimuli mice were in their  
249 cages at least 75% of the trial period (we discarded 15% of trials that did not meet these criteria).

250           We compared the preferences of 8-11 adults (at 9-14 weeks of age) of each species and  
251 sex for conspecific and heterospecific stimuli of the opposite sex. For female-choice trials, we  
252 tested virgin female preferences for either: (1) pairs of sexually experienced males that had  
253 successfully sired offspring with a conspecific female prior to use in the two-way choice trials  
254 (*P. leucopus*,  $N = 5$  trials; *P. gossypinus*,  $N = 7$  trials), or (2) pairs of virgin males as stimuli (*P.*  
255 *leucopus*,  $N = 6$  trials; *P. gossypinus*,  $N = 4$  trials). Because we did not detect a significant  
256 difference in female preference based on male stimulus sexual experience (two-sided Wilcoxon  
257 rank sum test, *P. gossypinus* females:  $W = 9$ ,  $p = 0.41$ ; *P. leucopus* females:  $W = 15$ ,  $p = 1$ ), we  
258 combined female preference data from trials with sexually experienced and virgin male stimuli.  
259 For male-choice trials, we used only virgin females as stimuli.

260           We estimated  $I_{PSI}$  for each sex separately in JMATING v. 1.0.8 (Carvajal-Rodriguez and  
261 Rolán-Alvarez 2006) because behavior of the stimuli may not be similar across male- and  
262 female-choice trials. We estimated  $I_{PSI}$  by considering the chooser and its most preferred  
263 stimulus as a “mated” pair; when we observed no mating, we replaced zero values with a 1 to  
264 allow for bootstrapping with resampling. We used 10,000 bootstrap replicates to estimate the  
265 isolation indices and test for deviation from random mating ( $I_{PSI} = 0$ ).

266

267 **Testing for sexual imprinting**

268           To determine whether conspecific mating preferences are learned in the nest, we  
269 measured the preferences of mice from each species after they had been cross-fostered—raised  
270 from birth until weaning—by parents of the opposite species. We swapped whole litters at birth  
271 between breeding pairs of *P. leucopus* and *P. gossypinus*, reducing litters to the same number of  
272 offspring if litters differed in number of pups. All cross-fostering attempts were successful,  
273 indicating that parents readily attended to unrelated offspring. We allowed cross-fostered  
274 offspring to remain with their foster parents until weaning (23 days after birth), when we  
275 separated offspring into same sex cages; this matches the life cycle of all other mice in our study.  
276 As a control, we also cross-fostered offspring within species (i.e. swapped litters between  
277 conspecific families) to partition the effects of litter transfer and foster parent species on mating  
278 preference. Although there is mixed (or incomplete) information for whether fathers contribute  
279 parental care in *P. leucopus* and *P. gossypinus* (Hartung and Dewsbury 1979; Schug et al. 1992),  
280 we cross-fostered offspring to both parents because we maintain male-female breeding pairs in  
281 our laboratory colonies of *P. leucopus* and *P. gossypinus* and aimed to compare preferences of  
282 mice from cross-fostered and non-cross-fostered trials.

283           We tested the mating preferences of all cross-fostered mice in the two-way gated choice  
284 assay described above. We predicted that if young mice sexually imprint on their parents, cross-  
285 fostered mice raised with the opposite species should prefer heterospecific stimuli and exhibit a  
286 weaker preference for conspecifics compared to individuals raised by their biological parents or  
287 other unrelated conspecific parents. We evaluated the effects of chooser sex and cross-fostering  
288 treatment on preferences for *P. leucopus* in each species, using linear modeling after applying an  
289 arcsin transformation to the proportion of time spent with *P. leucopus*. To test for the possibility

290 that the sexes within each species might react differently to cross-fostering, we considered  
291 models with and without an interaction between chooser sex and cross-fostering treatment and  
292 selected the best-fit models based on the lowest AIC.

293

#### 294 **Assessment of two-way choice assay**

295 We confirmed that our two-way mate choice assay accurately predicts mating preference  
296 by measuring whether the most preferred stimulus corresponded to mating events in a subset of  
297 trials in which mating occurred. We identified trials with successful mating events by either the  
298 presence of sperm in a female reproductive tract at the end of a trial or the birth of a litter three  
299 weeks later. If a female-choice trial resulted in offspring, we determined the identity of the father  
300 by genotyping both the male stimuli and the pups at two to three microsatellite markers (loci 14,  
301 35, and 80 from Weber et al. 2010) following the protocol described in Weber et al. 2010 ( $N =$   
302 15 trials) or screening video data for copulation events ( $N = 5$  trials). We tested whether the most  
303 preferred individual (as determined by the greatest proportion of association time) predicted  
304 mating success using a linear regression. We applied an arcsin transformation to association time  
305 proportions. This analysis allowed us to determine that association time is an accurate predictor  
306 of mating, and thus reflects mating preference.

307

## 308 **RESULTS**

### 309 **Hybridization is rare in sympatric populations**

310 Using thousands of markers across the genome summarized in a genetic PCA, we tested  
311 for evidence of hybridization between *P. leucopus* and *P. gossypinus* in sympatric populations.  
312 We identified six significant principal components by Tracy-Widom statistics with the following

313 eigenvalues: (1) 37.855, (2) 4.352, (3) 3.627, (4) 3.161, (5) 3.054, and (6) 2.941. Based on  
314 clustering with known allopatric and previously identified *P. leucopus* and *P. gossypinus*  
315 individuals, the first eigenvector clearly separates *P. leucopus* (negative values) and *P.*  
316 *gossypinus* (positive values) (Figure 1A). As expected, a control lab-generated F1 hybrid falls at  
317 the midpoint along the first eigenvector and a lab backcross mouse (F1 x *P. gossypinus*) falls half  
318 way between the F1 hybrid and the mean value of *P. gossypinus* values (Figure 1A). Of the 244  
319 sympatric mice we collected, all could be easily assigned to either the *P. leucopus* or *P.*  
320 *gossypinus* species, with only two exceptions: two mice from Big Lake Wildlife Management  
321 Area, Louisiana had intermediate values along eigenvector 1 (Figure 1A). These admixed  
322 individuals showed greater *P. leucopus* ancestry, similar to a F1 backcross or advanced  
323 backcross to *P. leucopus*, indicating that there may be biased gene flow from *P. gossypinus* into  
324 *P. leucopus*.

325         The second eigenvector revealed two genetically distinct *P. gossypinus* subgroups. These  
326 likely reflect genetic differences between *P. gossypinus* subspecies, *P. gossypinus gossypinus*  
327 and *P. gossypinus megacephalus*. Specifically, higher PC2 values corresponded to mice caught  
328 east of the Mississippi River—which are more likely to be *P. g. gossypinus*—whereas lower PC2  
329 values corresponded to mice caught west of the river—which are more likely to be *P. g.*  
330 *megacephalus* (Wolfe and Linzey 1977). The Mississippi river is a known biogeographic barrier  
331 for many species (Soltis et al. 2006), and our data suggest that this may also be the case for *P.*  
332 *gossypinus*. Only one individual from the Tunica Hills wildlife management area population in  
333 Louisiana failed to fit this pattern (Figure 1A): this individual occurred to the east of the  
334 Mississippi River but it clustered with individuals from the western group. We did not find any  
335 evidence to suggest a similar barrier to gene flow in *P. leucopus*, but we also did not have the



336 equivalent population-level sampling on both sides of the river. The remaining four eigenvectors  
337 (3, 4, 5, and 6) identified population structure within *P. leucopus* (Supplemental Figure 1).

338

### 339 ***P. leucopus* and *P. gossypinus* co-occur in mosaic sympatry**

340 Using cluster assignments based on the genetic PCA, we identified six of 13 sympatric  
341 sites that contained both species (Figure 1B). However, the other seven sites contained only a  
342 single species, highlighting the patchy distribution of both species within their broadly sympatric  
343 range from Texas and Virginia. Thus, our data confirm that the two species occur in mosaic  
344 sympatry.

345

### 346 **No evidence for intrinsic postzygotic isolation**

347 Previous studies have suggested that there is no measurable intrinsic postzygotic isolation  
348 in laboratory crosses of *P. leucopus* and *P. gossypinus* (Dice 1937). We confirmed this result in  
349 our independent lines (i.e., different spatial and temporal origin) of these two species. We first  
350 measured reproductive success within and between species in no-choice assays. The proportion  
351 of crosses that produced offspring was determined largely by the female (logistic regression:  $\beta =$   
352  $1.25$ ,  $SE = 0.47$ ,  $p = 0.008$ ), with *P. leucopus* females showing greater mean mating success than  
353 *P. gossypinus* (Supplemental Figure 2). Importantly, this means that *P. leucopus* females had  
354 greater reproductive success with *P. gossypinus* males (12/20 pairs had offspring) than the  
355 reciprocal cross between *P. gossypinus* females and *P. leucopus* males (6/20 pairs had offspring),  
356 indicating some asymmetry in either mate preferences, copulation attempts, or female fertility.  
357 Successful heterospecific crosses confirmed that we can produce viable F1 hybrids, which  
358 survive until reproductive age. In addition, we compared the mating successes of backcrosses to

359 conspecific and heterospecific crosses. We found that these F1 hybrids are as fertile in  
360 backcrosses (i.e., had similar frequency of litter production) as either conspecific or  
361 heterospecific crosses, and that all backcross offspring are also viable (Supplemental Figure 2).

362

### 363 **Mate choice causes significant sexual isolation**

364 We examined whether mating preferences lead to significant sexual isolation between the  
365 species in a laboratory environment (Supplemental Table 2). In no-choice assays, heterospecific  
366 pairs hybridized and produced viable offspring, indicating no measurable sexual isolation exists  
367 in the absence of mate choice ( $I_{PSI} = 0.00$ ,  $SD = 0.19$ ,  $p = 0.960$ ; Figure 2). However,  
368 conspecific, heterospecific, and backcross mating pairs had significantly different latencies to  
369 produce offspring (Figure 2; Kruskal-Wallis:  $\chi^2 = 6.7626$ ,  $df = 2$ ,  $p = 0.034$ ). Pairwise  
370 comparisons between mating pairs revealed significance differences in latency to mating only  
371 between conspecific and heterospecific mating pairs ( $W = 69$ ,  $p_{Bonferroni} = 0.010$ ). Heterospecific  
372 pairs took an average of 5.4 days longer to produce litters than conspecific pairs, indicative of  
373 either delayed heterospecific mating or longer hybrid gestation times. This delay is roughly  
374 equivalent to one estrus cycle in *Peromyscus* (Dewsbury et al. 1977).

375 By contrast, we detected significant sexual isolation between the species in two-way  
376 choice assays (Supplemental Table 2). Sexual isolation estimates were similar in female- and  
377 male-choice trials: *P. leucopus* and *P. gossypinus* females strongly preferred conspecific mates  
378 (Figure 3B;  $I_{PSI} = 0.75$ ,  $SD = 0.14$ ,  $p < 0.01$ ) as did *P. leucopus* and *P. gossypinus* males (Figure  
379 3B;  $I_{PSI} = 0.75$ ,  $SD = 0.15$ ,  $p < 0.01$ ). More generally, there were strong preferences for  
380 conspecific mates in both species, regardless of sex.

381

## 382 Sexual imprinting contributes to sexual isolation in at least one species

383 We next investigated whether mating preferences in these species had a learned or  
384 genetic basis using a series of cross-fostering experiments and found that cross-fostering had  
385 different effects on mating preference in the two focal species. In *P. leucopus*, the AIC selected a  
386 model in which cross-fostering, sex, and their interaction was significant ( $F = 5.09$  on 3 and 25  
387 df,  $p = 0.007$ ). When raised with their own parents, *P. leucopus* of both sexes preferred *P.*  
388 *leucopus* stimuli (Figure 3B; female *P. leucopus* preference  $\hat{p} = 0.689$ ; male *P. leucopus*  
389 preference  $\hat{p} = 0.959$ ). *P. leucopus* males that were cross-fostered significantly changed their  
390 preference (Figure 3C; *P. leucopus* preference  $\hat{p} = 0.184$ ;  $t = 3.853$ ,  $p_{\text{Bonferroni}} = 0.001$ ), whereas  
391 cross-fostering did not significantly change female preferences (Figure 3; *P. leucopus* preference  
392  $\hat{p} = 0.764$ ;  $t = -0.390$ ,  $p_{\text{Bonferroni}} = 1$ ). Thus, *P. leucopus* females always preferred *P. leucopus* to  
393 *P. gossypinus* mates, whereas males spent more time with the species by whom it was raised

394 In *P. gossypinus*, the model selected by AIC showed a strong cross-fostering effect but no  
395 significant sex effects or interactions between cross-fostering and sex ( $F = 51.31$  on 1 and 33 df,  
396  $p < 0.001$ ). When raised with their own parents, *P. gossypinus* of both sexes preferred *P.*  
397 *gossypinus* stimuli (Figure 3B; *P. leucopus* preference  $\hat{p} = 0.069$ ), whereas *P. gossypinus* raised  
398 with *P. leucopus* preferred *P. leucopus* stimuli (Figure 3C; *P. leucopus* preference  $\hat{p} = 0.781$ ).

399 To confirm that the preference reversal in *P. gossypinus* was not an effect of transferring  
400 litters but rather an effect of the foster parent species, we collected an additional control dataset  
401 for *P. gossypinus*. We cross-fostered *P. gossypinus* to unrelated *P. gossypinus* foster parents  
402 (females:  $N = 4$ , males:  $N = 7$ ) and found that foster species, and not the litter transfer itself,  
403 affected *P. gossypinus* preferences (Supplemental Figure 3). Pairwise t-tests on arcsin-  
404 transformed proportion of time spent with *P. leucopus* revealed no significant differences

405 between *P. gossypinus* raised with their own parents or unrelated conspecific parents ( $t = -0.72$ ,  
406  $df = 15.38$ ,  $p_{\text{Bonferroni}} = 1$ ). Thus, *P. gossypinus* males and females preferred *P. gossypinus* to *P.*  
407 *leucopus* mates, independent of if they were related to their conspecific parents.

408 To examine the effects of sexual imprinting on sexual isolation, we calculated the sexual  
409 isolation index assuming the most preferred stimulus from each heterospecifically cross-fostered  
410 choice trial (Figure 3C) as a “successful mating”. Cross-fostering eliminated sexual isolation in  
411 female-choice trials ( $I_{\text{PSI}} = 0.25$ ,  $SD = 0.34$ ,  $p = 0.57$ ) and male-choice trials ( $I_{\text{PSI}} = -0.29$ ,  $SD =$   
412  $0.42$ ,  $p = 0.32$ ). Thus, our cross-fostering results confirm that sexual isolation between *P.*  
413 *leucopus* and *P. gossypinus* is the result of sexual imprinting.

414

#### 415 **Two-way choice test accurately measures preference**

416 To confirm that the time spent with either stimulus mouse was an accurate predictor of  
417 mate preference and hence mate choice, we recorded 20 mating events in our two-way choice  
418 assays: 12 mating events occurred in trials where choosers were raised with their own parents  
419 and 8 trials where choosers were raised with heterospecific foster parents. In 19 out of 20 trials,  
420 choosers mated with the stimulus individual with which they spent the most time (Figure 4).  
421 Mating outcome (with conspecific or heterospecific stimulus) was predicted by proportion of  
422 time spent with the conspecific stimulus (logistic regression:  $\beta = 10.06$ ,  $SE = 4.86$ ,  $p = 0.04$ ),  
423 indicating that our two-way choice assay accurately detects mating preferences.

424

#### 425 **DISCUSSION**

426 Sexual imprinting could be a powerful generator of sexual isolation because it quickly  
427 and effectively associates preferences with traits in populations. Furthermore, sexual imprinting

428 has been documented in a diversity of taxa—e.g. birds, fish, mammals, amphibians, and  
429 insects—suggesting it could be a broadly important driver of speciation (Immelmann 1975). Our  
430 study shows that sexually imprinted mate-choice has maintained and contributed to strong sexual  
431 reproductive isolation in a classic mammalian system.

432

### 433 **Rare hybridization in sympatry indicates a high degree of reproductive isolation**

434 To test the strength of reproductive isolation between *P. leucopus* and *P. gossypinus* in  
435 nature, we collected 374 mice from across their range overlap and generated genomic data to  
436 measure the frequency of hybridization between these species in sympatry. Classic studies by  
437 mammalogists in the mid 1900's reported mixed evidence as to the extent of interspecific  
438 hybridization in sympatric populations. In Louisiana, Alabama, and southern Illinois, Howell  
439 (1921) and later McCarley (1954) identified a few intermediate individuals resembling hybrids  
440 based on morphology and allozyme genotypes. By contrast, Dice (1940) found no evidence of  
441 morphological intermediates in his studies in Virginia. Thus, it was unclear how frequently these  
442 species hybridize in the wild.

443 In our study, we found less than 1% of individuals collected from sites in which both  
444 species co-occurred were admixed. Our genomic analysis thus supports the conclusions of  
445 previous studies that suggested *P. leucopus* and *P. gossypinus* may remain genetically distinct in  
446 nature (Dice 1940; Price and Kennedy 1980; Robbins et al. 1985) in spite of rare hybrids  
447 (Howell 1921; McCarley 1954b; Barko and Feldhamer 2002). The two hybrids that we found  
448 were both from Big Lake Wildlife Management Area (Louisiana), and they had greater  
449 proportions of *P. leucopus* ancestry. At this site, *P. gossypinus* were less common than *P.*  
450 *leucopus*, potentially accounting for the biased gene flow into *P. leucopus*. Previous behavioral

451 data also support the possibility of biased gene flow from *P. gossypinus* into *P. leucopus*. For  
452 example, using population cages to test interactions among pairs of male and female *P. leucopus*  
453 and *P. gossypinus*, Bradshaw (1965) found that *P. leucopus* females were far more tolerant of *P.*  
454 *gossypinus* males than vice versa. Although no hybrid offspring were produced in this study, if  
455 heterospecific matings were to occur, one would predict they would be in the direction of a *P.*  
456 *leucopus* female with a *P. gossypinus* male.

457         Although we detected some admixture and possible biased gene flow from *P. gossypinus*  
458 into *P. leucopus*, the overall lack of pervasive hybridization between these otherwise inter-fertile  
459 species suggests that they are strongly reproductively isolated in nature. Our genomic data  
460 revealed that *P. leucopus* and *P. gossypinus* are distributed in a mosaic sympatry, with many  
461 sites containing only one species (seven of thirteen sampling sites). This patchiness could be  
462 driven by differences in microhabitat use: *P. leucopus* often occupy upland habitat and use more  
463 arboreal nest sites while *P. gossypinus* often occupy swamps and bottomland habitat and use  
464 more ground nest sites when they co-occur (McCarley 1954c, 1963; Taylor and Mccarley 1963).  
465 However, these habitat differences are not enough to exclude contact in sympatry because both  
466 species can be trapped in the same patch of forest, especially where these habitat types abut  
467 (Dice 1940; Calhoun 1941; Price and Kennedy 1980; Roehrs et al. 2012). In fact, we often  
468 caught both species in the same trap line. Similarly, there do not appear to be any significant  
469 differences in breeding seasons: the two species have overlapping peak reproductive activities in  
470 the winter months, but adults from both species can also be caught in reproductive condition  
471 throughout the year in Texas, Louisiana, and Alabama (Pournelle 1952; McCarley 1954a; Wolfe  
472 and Linzey 1977). Thus, the distributions, habitat preferences, and breeding seasons do not

473 appear to form complete or even strong reproductive barriers, suggesting that behavioral  
474 differences may be the most important cause of reproductive isolation.

475

476 ***P. leucopus* and *P. gossypinus* remain genetically distinct due to learned sexual isolation**

477 We tested for evidence of sexual isolation, as previous studies suggested that mating  
478 preferences might explain the lack of hybridization in the wild. Using no-choice and choice trials  
479 to examine *P. leucopus* and *P. gossypinus* mating preferences, we found that conspecific  
480 preferences form a significant sexual reproductive barrier between the two species. Without a  
481 choice of mates, *P. leucopus* and *P. gossypinus* did not show significant sexual isolation,  
482 although there was an increase in latency to mate in heterospecific relative to conspecific pairs.  
483 However, when given a choice of mates, the species mated assortatively, and we estimated the  
484 average joint sexual isolation index ( $I_{PSI}$ ) between the species to be 0.651. While sexual isolation  
485 is not yet complete ( $I_{PSI} < 1$ ) between these species, the amount of sexual isolation we have  
486 observed is far greater than what has been detected among cactophilic ( $I_{PSI} = 0.12$ ; Etges and  
487 Tripodi 2008) or Caribbean *Drosophila* ( $I_{PSI} = 0.159-0.282$ ; Yukilevich and True 2008), walking  
488 stick insect populations ( $I_{PSI} = 0.24-0.53$ ; Nosil et al. 2013), or gold and normal Nicaraguan  
489 cichlid color morphs ( $I_{PSI} = 0.39$  and  $0.86$ ; Elmer et al. 2009), placing *P. leucopus* and *P.*  
490 *gossypinus* quite far along a speciation continuum.

491 We cannot determine if sexual isolation resulted because of strong female preferences  
492 and weak male preferences (where males select mates based on female acceptance or rejection)  
493 or the reverse, weak female preferences and strong male preferences (where females select mates  
494 based on male courtship). However, because our test apparatus provides the opportunity for

495 choosers to avoid either stimulus, we interpret a pattern of sexual isolation in female- and male-  
496 choice trials to be the result of active conspecific preferences in both sexes.

497 Our two-way choice results, compared to our no-choice results, indicate that mating  
498 preferences increase sexual isolation (Coyne et al. 2005). Testing the mating preferences of  
499 heterospecifically cross-fostered mice revealed that both species are affected by sexual  
500 imprinting, but that the degree of imprinting differed by species and sex. For one, both male and  
501 female *P. gossypinus* strongly sexually imprinted on their foster parent species, indicating that  
502 mating preferences in *P. gossypinus* are entirely learned. By contrast, we found that *P. leucopus*  
503 also sexually imprint on their parents, though weakly. Some *P. leucopus* males had a reduced  
504 preference for conspecifics when raised with heterospecific parents, whereas all *P. leucopus*  
505 females appeared unaffected by cross-fostering. In other words, *P. leucopus* females showed an  
506 own species bias, suggesting that their mate preferences could be genetic. *P. leucopus* showed a  
507 similar sexual difference in imprinting in a study that examined *P. leucopus* preferences for  
508 soiled bedding after cross-fostering to grasshopper mice, *Onychomys torridus* (McCarty and  
509 Southwick 1977a): male and female *P. leucopus* raised with *O. torridus* parents had decreased  
510 preference for conspecific soiled bedding, but the effect was more dramatic in males than  
511 females. Thus, both *P. leucopus* and *P. gossypinus* appear to learn mating preferences, but the  
512 degree of sexual imprinting varies between the two species, particularly in cross-fostered *P.*  
513 *leucopus* females which show a bias towards mates of their own species.

514

515 **Genetic preference or preference reversal after socialization may account for the lack of**  
516 **sexual imprinting observed in *P. leucopus* females**



517           Sex differences in sexual imprinting are most likely caused by sex-specific genetic (or  
518 epigenetic) differences in learning, or learning in both sexes followed by preference reversal in  
519 one sex after social interaction. Sex-specific genetic differences that affect the length of the  
520 sensitive learning period or how the learned preference is internalized could create a sex bias in  
521 learning. In some species such as sticklebacks and cichlids, only one sex (females) sexually  
522 imprints (Verzijden and ten Cate 2007; Verzijden et al. 2009; Kozak et al. 2011); in other species  
523 such as zebra finches, both sexes sexually imprint but on different parental cues (Vos 1995).  
524 Learning in these species may be affected by sex-specific differences, but genetic loci that cause  
525 these differences have yet to be identified. Alternatively, conspecific mating preferences could  
526 be epigenetically-determined by parental behaviors or experiences. Some behavioral traits such  
527 as pup licking in rats (Francis et al. 1999), fear of odors in mice (Dias and Ressler 2013), anxiety  
528 in stickleback fish (McGhee and Bell 2014), have been linked to epigenetic inheritance. We  
529 cannot rule out that conspecific preferences in female *P. leucopus* were determined  
530 epigenetically, but suspect that social interactions most likely explain the own species bias in *P.*  
531 *leucopus* females.

532           Social interactions can also influence sexual imprinting, and may be more likely to  
533 account for sex differences. Irwin & Price (1999) describe a learning model in which offspring  
534 might initially develop a generalized behavioral response to a range of traits resembling their  
535 parents that later contracts after experience with heterospecifics. In cross-fostering studies, this  
536 model would be supported by instances in which individuals sexually imprint on their foster  
537 parents but subsequently alter their preferences in the presence of conspecifics. For example, a  
538 longitudinal study of the effects of cross-fostering between sheep and goats found that females  
539 initially preferred males of their foster species but later preferred conspecifics after a year of

540 socialization with conspecifics (Kendrick et al. 1998). Such preference reversals might be driven  
541 because of courtship behavior.

542       Species in which females show an own species bias after cross-fostering treatments with  
543 heterospecific parents have often been shown to be affected by differences in the courtship  
544 activity of male stimuli. For example, female zebra finches raised with heterospecific Bengalese  
545 foster parents spent more time with Bengalese males but directed more sexually receptive tail  
546 quivering behavior to conspecific males (ten Cate and Mug 1984); this own species bias was  
547 shown to be the result of greater conspecific male courtship activity. Male zebra finches sang  
548 more vigorously and frequently than Bengalese males, biasing female sexual behavior toward  
549 conspecifics (ten Cate and Mug 1984). Male courtship activity has also been shown to modify  
550 sexually imprinted preferences in female mallards (Bossema and Kruijt 1982; Kruijt et al. 1982).  
551 In our trials, male *P. leucopus* stimuli could have directed more copulatory behavior toward *P.*  
552 *leucopus* females, whereas male *P. gossypinus* stimuli may have been antagonistic, causing *P.*  
553 *leucopus* females to develop stronger preferences for conspecific males. Females could have  
554 been responsive to differences in ultrasonic vocalizations which help attract mates (Pomerantz et  
555 al. 1983; Musolf et al. 2010), male mounting attempts, or aggression. Because our choice assay  
556 permits physical interaction between the stimuli and the chooser mice, we cannot rule out the  
557 very likely possibility that *P. leucopus* females did sexually imprint but are affected by the  
558 behavior of stimuli in our two-way choice assay.

559       Further studies designed to test for sexual imprinting as a function of species-directed  
560 male courtship may be able to determine whether *P. leucopus* females sexually imprint but alter  
561 their preferences based on conspecific courtship activity, or if they truly show an innate  
562 preference for males of their own species. Whether *P. leucopus* females show biased conspecific

563 preferences because of genetic differences or subsequent social interactions, the asymmetry in  
564 *P. leucopus* female and *P. gossypinus* female responses suggest that the species differ  
565 meaningfully in either female learning or male courtship behaviors.

566

### 567 **Sexual imprinting cues**

568         Although we do not know the precise imprinting cues (e.g., odors, vocalizations) that *P.*  
569 *leucopus* and *P. gossypinus* learn in the nest, they most likely learn olfactory cues as other  
570 rodents are known to imprint on nest odors (Mainardi et al. 1965; Marr and Gardner 1965; Carter  
571 and Marr 1970; Quadagno and Banks 1970; McCarty and Southwick 1977a; Porter et al. 1983).  
572 If *P. leucopus* and *P. gossypinus* diverged in odor sources containing species, sex, or individual  
573 information such as saliva (Gray et al. 1984; Smith and Block 1991; Talley et al. 2001), urine  
574 (Doty 1973; Smadja and Ganem 1998; Pillay 2000; Hurst et al. 2001), scent marks (Johnston and  
575 Brenner 1982; Becker et al. 2012), or major histocompatibility complex alleles (Yamazaki et al.  
576 1979; Brown et al. 1989), these could serve as imprinting cues (e.g. Penn & Potts 1998). *P.*  
577 *leucopus* and *P. gossypinus* have diverged in small urinary proteins (Cain et al. 1992) and *P.*  
578 *leucopus* have been shown to sexually imprint on olfactory information (McCarty and Southwick  
579 1977b), suggesting that sexual imprinting could be olfactory-based in this species pair.

580         Natural olfactory signals, which are affected by diet, could have been obscured by the  
581 common Purina laboratory diet that we fed our *P. leucopus* and *P. gossypinus* stocks. Diet  
582 influences odors in guinea pigs (Beauchamp 1976), mice (Schellinck et al. 1992), and voles  
583 (Ferkin et al. 1997), and *P. gossypinus* and *P. leucopus* consume different diets in nature. *P.*  
584 *gossypinus* is mainly carnivorous, with over two thirds its stomach contents containing animal  
585 matter (insects and gastropods) compared to *P. leucopus*, which is primarily herbivorous, with

586 greater than two thirds of its stomach contents containing plant matter (Calhoun 1941). If  
587 species-specific olfactory signals (e.g., urine, feces, scent marks) were affected by different diets,  
588 imprinting cues and thus sexual isolation may be much more pronounced between natural  
589 populations of *P. leucopus* and *P. gossypinus* than what we have detected in the laboratory.

590

### 591 **Sexual imprinting may limit the effects of rare hybridization**

592 When gene flow occurs, theoretical models have shown that sexual imprinting can create  
593 substantial reproductive isolation and facilitate sympatric speciation more often than genetic  
594 preferences (Verzijden et al. 2005). When hybrid fitness is high, as is the case for *P. leucopus*  
595 and *P. gossypinus*, mating preferences formed by sexual imprinting may be more effective at  
596 producing reproductive isolation than if the preferences were genetically controlled on  
597 autosomes or sex chromosomes (Servedio et al. 2009).

598 We suspect that occasional hybridization between *P. leucopus* and *P. gossypinus* might  
599 be tolerated because sexual imprinting would prevent the formation of a hybrid swarm. The two  
600 hybrids that we found showed greater *P. leucopus* ancestry, indicating asymmetrical gene flow  
601 from *P. gossypinus* to *P. leucopus*. While we did not have mitochondrial or Y chromosome  
602 markers in our dataset that would have allowed us to identify which type of heterospecific  
603 mating pair produced these hybrids, our no-choice data indicate that *P. leucopus* females have  
604 greater reproductive success with *P. gossypinus* males than *P. gossypinus* females have with *P.*  
605 *leucopus* males. We therefore predict that the few hybrids we found are likely offspring from an  
606 initial cross between a *P. leucopus* mother and a *P. gossypinus* father. Furthermore, *P. leucopus*  
607 females are far more tolerant of *P. gossypinus* males than the reciprocal direction (Bradshaw  
608 1965). If *Peromyscus* offspring sexually imprint on their mothers as they do in other mammals,

609 we would expect F1 hybrids to preferentially backcross with *P. leucopus* mates, facilitating  
610 asymmetrical gene flow while simultaneously preventing rampant hybridization. This type of  
611 sexual imprinting analysis in F1 hybrids is seldom done (but see Albert 2005), but could reveal  
612 how sexual imprinting might bias gene flow. In a limited number of unpublished trials, we found  
613 evidence that *Peromyscus* mice sexually imprint on mothers (i.e., sexual imprinting still occurs  
614 when no fathers are present). Although more rigorous testing is necessary to determine if  
615 *Peromyscus* imprint on one or both parents, we predict that maternal imprinting leads to  
616 introgression but prevents complete admixture, allowing the species to remain genetically  
617 distinct in sympatry even with a small amount of hybridization.

618         Sexual imprinting might also prevent rampant gene flow between inter-fertile sympatric  
619 species if it becomes reinforced (Irwin and Price 1999; Servedio et al. 2009). There is some  
620 evidence for reinforcement between *P. leucopus* and *P. gossypinus*. In a nesting assay,  
621 sympatric *P. gossypinus* males and females and *P. leucopus* females preferred to spend more  
622 time near conspecific individuals, while allopatric mice from both species showed no significant  
623 preference for conspecifics (McCarley 1964). Similar patterns of increased species recognition in  
624 sympatry have also been observed between *P. eremicus* and *P. californicus* (Smith 1965; Carter  
625 and Brand 1986). However, for reinforcement to occur, hybrids must have reduced fitness. We  
626 did not find evidence of hybrid inviability or sterility in our laboratory study, but we did not  
627 quantify the degree of hybrid fertility which can vary in severity in hybrid zones (e.g. Turner et  
628 al. 2011). In contrast to fertility-related traits, there is some evidence of postzygotic behavioral  
629 sterility. A previous study found that *P. leucopus* and *P. gossypinus* reciprocal hybrids have  
630 copulatory behaviors like each parental species but that they initiate copulation less frequently  
631 than either *P. leucopus* or *P. gossypinus* (Lovecky et al. 1979). Similarly, both reciprocal hybrids

632 have similar exploratory behavior to both parental species but spent more time freezing in open-  
633 field exploratory behavior tests (Wilson et al. 1976). In nature, any reduced mating success or  
634 exploratory behavior would reduce hybrid fitness relative to their parents. Finally, hybrids might  
635 also be behaviorally sterile if they have intermediate mating traits. For example, hybrids between  
636 *M. m. musculus* and *M. m. domesticus* have intermediate urinary signals that are sexually  
637 selected against by each subspecies (Latour et al. 2014). The potential for hybrid behavioral  
638 sterility, coupled with the fact that moderate sexual imprinting induces sexual isolation in our  
639 allopatric lab stocks, suggests that it may be possible for reinforcement to boost reproductive  
640 isolation in sympatry, helping explain the paucity of hybrids we have observed in our study.

641

## 642 **CONCLUSION**

643 Our study supports an emerging view that sexual imprinting could be vital to the  
644 generation and maintenance of sexual reproductive barriers. Pending divergent natural selection  
645 on an imprintable trait, a species that learns mating preferences may develop significant sexual  
646 isolation that might mitigate the effects of hybridization. Our demonstration of sexual imprinting  
647 in *Peromyscus leucopus* and *P. gossypinus*, sympatric sister species that have few other  
648 reproductive barriers between them, indicates that sexual imprinting may disproportionately  
649 contribute to their total reproductive isolation. Sexual imprinting may sculpt reproductive  
650 isolation in subspecies (e.g. benthic and limnetic sticklebacks) undergoing initial morphological  
651 and behavioral divergence, or help preserve reproductive isolation between already divergent  
652 species, as we have shown to be the case in *P. leucopus* and *P. gossypinus*. Examining the role of  
653 sexual imprinting in similar cases of speciation driven by sexual reproductive barriers will  
654 continue to expand our understanding of the role of behavior in speciation.

655 **Acknowledgements:** We thank members of the Hoekstra lab who helped with field work: G.  
656 Gonçalves, V. Domingues, H. Fisher, E. Jacobs-Palmer, E. Kingsley, C. Linnen, H. Metz, B.  
657 Peterson, J. Weber, and several undergraduates, A. Chiu, K. Lin, and E. zu Ermgassen; we also  
658 thank E. Pivorun, R. Sikes, and their students for assistance with field work. J. Chupasko and M.  
659 Omura from the MCZ Mammal Department helped with specimen preparation. Nokuse  
660 Plantation granted us permission to trap on their property. The following museums donated  
661 tissue samples: Museum of Comparative Zoology, Oklahoma State University Collection of  
662 Vertebrates, Sam Noble Museum of Natural History, and the Museum of Texas Tech University.  
663 We also wish to thank N. Delaney, K. Ferris, and J. Mallet for helpful discussions and comments  
664 on this manuscript. This work was funded by: NSF GRFP, NSF DDIG, and grants from the  
665 American Society of Mammalogists, Animal Behavior Society, and the Harvard University  
666 Mind, Brain & Behavior Initiative to EKD. HEH is an Investigator of the Howard Hughes  
667 Medical Institute. The authors have no conflicts of interest.

668

669 **Author contributions:** EKD and HEH conceived the project. EKD collected and analyzed the  
670 data. EKD and HEH wrote the paper.

671

## 672 **References**

673 Albert, A. Y. K. 2005. Mate choice, sexual imprinting, and speciation: a test of a one-allele  
674 isolating mechanism in sympatric sticklebacks. *Evolution* 59:927–931.

675 Barko, V. A., and G. A. Feldhamer. 2002. Cotton mice (*Peromyscus gossypinus*) in southern  
676 Illinois: evidence for hybridization with white-footed mice (*Peromyscus leucopus*). *Am.*

- 677 Midl. Nat. 147:109–115.
- 678 Beauchamp, G. K. 1976. Diet influences attractiveness of urine in guinea pigs. *Nature* 263:587–  
679 588.
- 680 Becker, E. A., S. Petrino, and C. A. Marler. 2012. A comparison of scent marking between a  
681 monogamous and promiscuous species of *Peromyscus*: pair bonded males do not advertise  
682 to novel females. *PLoS One* 7:e32002.
- 683 Blair, W. F. 1950. Ecological factors in speciation of *Peromyscus*. *Evolution* 4:253–275.
- 684 Bossema, I., and J. P. Kruijt. 1982. Male activity and female mate acceptance in the mallard  
685 (*Anas platyrhynchos*). *Behaviour* 79:313–324.
- 686 Boughman, J. W., H. D. Rundle, and D. Schluter. 2005. Parallel evolution of sexual isolation in  
687 sticklebacks. *Evolution* 59:361–373.
- 688 Bradshaw, H. D., and D. W. Schemske. 2003. Allele substitution at a flower colour locus  
689 produces a pollinator shift in monkeyflowers. *Nature* 426:176–178.
- 690 Bradshaw, W. N. 1968. Progeny from experimental mating tests with mice of the *Peromyscus*  
691 *leucopus* group. *J. Mammal.* 49:475–480.
- 692 Bradshaw, W. N. 1965. Species discrimination in the *Peromyscus leucopus* group of mice. *Texas*  
693 *J. Sci.* 17:278–293.
- 694 Brown, R. E., B. Roser, and P. B. Singh. 1989. Class I and class II regions of the major  
695 histocompatibility complex both contribute to individual odors in congenic inbred strains of  
696 rats. *Behav. Genet.* 19:659–674.
- 697 Cain, K. A., T. A. Burns, and D. T. Stalling. 1992. Urinary proteins in four rodent species.  
698 *Comp. Biochem. Physiol.* 101B:199–204.
- 699 Calhoun, J. B. 1941. Distribution and food habits of mammals in the vicinity of the Reelfoot



- 700 Lake Biological Station. *J. Tennessee Acad. Sci.* 16:177–187.
- 701 Carter, C. S., and J. N. Marr. 1970. Olfactory imprinting and age variables in the guinea-pig,  
702 *Cavia porcellus*. *Anim. Behav.* 18:238–244.
- 703 Carter, R. L., and L. R. Brand. 1986. Species recognition in wild-caught, laboratory-reared and  
704 cross-fostered *Peromyscus californicus* and *Peromyscus eremicus* (Rodentia, Cricetidae).  
705 *Anim. Behav.* 34:998–1006.
- 706 Coyne, J. A., S. Elwyn, and E. Rolán-Alvarez. 2005. Impact of experimental design on  
707 *Drosophila* sexual isolation studies: direct effects and comparison to field hybridization  
708 data. *Evolution* 59:2588–2601.
- 709 Coyne, J. A., and H. A. Orr. 1989. Patterns of speciation in *Drosophila*. *Evolution* 43:362–381.
- 710 Coyne, J. A., and H. A. Orr. 1997. “Patterns of speciation in *Drosophila*” revisited. *Evolution*  
711 51:295–303.
- 712 DePristo, M. A., E. Banks, R. Poplin, K. V Garimella, J. R. Maguire, C. Hartl, A. A. Philippakis,  
713 G. del Angel, M. A. Rivas, M. Hanna, A. McKenna, T. J. Fennell, A. M. Kernytsky, A. Y.  
714 Sivachenko, K. Cibulskis, S. B. Gabriel, D. Altshuler, and M. J. Daly. 2011. A framework  
715 for variation discovery and genotyping using next-generation DNA sequencing data. *Nat.*  
716 *Genet.* 43:491–498.
- 717 Dewsbury, D. A., D. Q. Estep, and D. L. Lanier. 1977. Estrous cycles of nine species of muroid  
718 rodents. *J. Mammal.* 58:89–92.
- 719 Dias, B. G., and K. J. Ressler. 2014. Parental olfactory experience influences behavior and neural  
720 structure in subsequent generations. *Nat. Neurosci.* 17:89-96.
- 721 Dice, L. R. 1937. Fertility relations in the *Peromyscus leucopus* group of mice. *Contrib. Lab.*  
722 *Vert. Genet.* 4:1–3.

- 723 Dice, L. R. 1940. Relationships between the wood-mouse and the cotton-mouse in eastern  
724 Virginia. *J. Mammal.* 21:14–23.
- 725 Doty, R. L. 1973. Reactions of deer mice (*Peromyscus maniculatus*) and white-footed mice  
726 (*Peromyscus leucopus*) to homospecific and heterospecific urine odors. *J. Comp. Physiol.*  
727 *Psychol.* 84:296–303.
- 728 Elmer, K. R., T. K. Lehtonen, and A. Meyer. 2009. Color assortative mating contributes to  
729 sympatric divergence of neotropical cichlid fish. *Evolution* 63:2750–2757.
- 730 Etges, W. J., and D. A. Tripodi. 2008. Premating isolation is determined by larval rearing  
731 substrates in cactophilic *Drosophila mojavensis*. VIII. Mating success mediated by  
732 epicuticular hydrocarbons within and between isolated populations. *J. Evol. Biol.* 21:1641–  
733 1652.
- 734 Felsenstein, J. 1981. Skepticism towards Santa Rosalia, or why are there so few kinds of  
735 animals? *Evolution* 35:124–138.
- 736 Ferkin, M. H., E. S. Sorokin, R. E. Johnston, and C. J. Lee. 1997. Attractiveness of scents varies  
737 with protein content of the diet in meadow voles. *Anim. Behav.* 53:133–141.
- 738 Fisher, H. S., B. B. M. Wong, and G. G. Rosenthal. 2006. Alteration of the chemical  
739 environment disrupts communication in a freshwater fish. *Proc. R. Soc. B.* 273:1187–1193.
- 740 Francis, D., J. Diorio, D. Liu, and M. J. Meaney. 1999. Nongenomic transmission across  
741 generations of maternal behavior and stress responses in the rat. *Science* 286:1155–1158.
- 742 Grant, P. R., and B. R. Grant. 1997. Hybridization, sexual imprinting, and mate choice. *Am. Nat.*  
743 149:1–28.
- 744 Gray, B., R. B. Fischer, and G. F. Meunier. 1984. Preferences for salivary odor cues by female  
745 hamsters. *Horm. Behav.* 18:451–456.

- 746 Hall, E. R. 1981. The mammals of North America. Second edition. John Wiley & Sons, New  
747 York.
- 748 Hall, E. R. and K. R. Kelson. 1959. The mammals of North America. Ronald Press, New York.
- 749 Hartung, T. G., and D. A. Dewsbury. 1979. Paternal behavior in six species of muroid rodents.  
750 Behav. Neural Biol. 26:466–478.
- 751 Howell, A. H. 1921. A biological survey of Alabama. North Am. Fauna 45:1–89.
- 752 Hurst, J. L., C. E. Payne, C. M. Nevison, A. D. Marie, R. E. Humphries, D. H. L. Robertson, A.  
753 Cavaggioni, and R. J. Beynon. 2001. Individual recognition in mice mediated by major  
754 urinary proteins. Nature 414:631–634.
- 755 Immelmann, K. 1975. Ecological significance of imprinting and early learning. Annu. Rev. Ecol.  
756 Evol. Syst. 6:15–37.
- 757 Irwin, D. E., and T. Price. 1999. Sexual imprinting, learning and speciation. Heredity 82:347–  
758 354.
- 759 Jiggins, C. D., R. E. Naisbit, R. L. Coe, and J. Mallet. 2001. Reproductive isolation caused by  
760 colour pattern mimicry. Nature 411:302–305.
- 761 Johnston, R. E., and D. Brenner. 1982. Species-specificity of scent marking in hamsters. Behav.  
762 Neural Biol. 35:46–55.
- 763 Kendrick, K. M., M. R. Hinton, K. Atkins, M. A. Haupt, and J. D. Skinner. 1998. Mothers  
764 determine sexual preferences. Nature 395:229–230.
- 765 Kozak, G. M., and J. W. Boughman. 2009. Learned conspecific mate preference in a species pair  
766 of sticklebacks. Behav. Ecol. 20:1282–1288.
- 767 Kozak, G. M., M. L. Head, and J. W. Boughman. 2011. Sexual imprinting on ecologically  
768 divergent traits leads to sexual isolation in sticklebacks. Proc. R. Soc. B. 278:2604–2610.

- 769 Kruijt, J. P., I. Bossema, and G. J. Lammers. 1982. Effects of early experience and male activity  
770 on mate choice in mallard females (*Anas platyrhynchos*). Behaviour 80:32–43.
- 771 Lackey, J. A., D. G. Huckaby, and B. G. Ormiston. 1985. *Peromyscus leucopus*. Mamm. Species  
772 247:1–10.
- 773 Laland, K. N. 1994. On the evolutionary consequences of sexual imprinting. Evolution 48:477–  
774 489.
- 775 Latour, Y., M. Perriat-Sanguinet, P. Caminade, P. Boursot, C. M. Smadja, and G. Ganem. 2014.  
776 Sexual selection against natural hybrids may contribute to reinforcement in a house mouse  
777 hybrid zone. Proc. R. Soc. B. 281:20132733.
- 778 Lovecky, D. V., D. Q. Estep, and D. A. Dewsbury. 1979. Copulatory behavior of cotton mice  
779 (*Peromyscus gossypinus*) and their reciprocal hybrids with white-footed mice (*P. leucopus*).  
780 Anim. Behav. 27:371–375.
- 781 Lunter, G., and M. Goodson. 2011. Stampy: a statistical algorithm for sensitive and fast mapping  
782 of Illumina sequence reads. Genome Res. 21:936–939.
- 783 Mainardi, D., M. Marsan, and A. Pasquali. 1965. Causation of sexual preferences of the house  
784 mouse. The behavior of mice reared by parents whose odor was artificially altered. Atti.  
785 Soc. Ital. Sci. Nat. 104:325–338.
- 786 Marr, J. N., and L. E. J. Gardner. 1965. Early olfactory experience and later social behaviour in  
787 the rat: preference, sexual responsiveness, and care of young. J. Genet. Psychology  
788 107:167–174.
- 789 Matsubayashi, K. W., and H. Katakura. 2009. Contribution of multiple isolating barriers to  
790 reproductive isolation between a pair of phytophagous ladybird beetles. Evolution 63:2563–  
791 2580.

- 792 McCarley, H. 1963. Distributional relationships of sympatric populations of *Peromyscus*  
793 *leucopus* and *P. gossypinus*. *Ecology* 44:784–788.
- 794 McCarley, H. 1964. Ethological isolation in the cenospecies *Peromyscus leucopus*. *Evolution*  
795 18:331–332.
- 796 McCarley, W. H. 1954a. Fluctuations and structure of *Peromyscus gossypinus* populations in  
797 eastern Texas. *J. Mammal.* 35:526–532.
- 798 McCarley, W. H. 1954b. Natural hybridization in the *Peromyscus leucopus* species group of  
799 mice. *Evolution* 8:314–323.
- 800 McCarley, W. H. 1954c. The ecological distribution of the *Peromyscus leucopus* species group  
801 in eastern Texas. *Ecology* 35:375–379.
- 802 McCarty, R., and C. H. Southwick. 1977a. Cross-species fostering: effects on the olfactory  
803 preference of *Onychomys torridus* and *Peromyscus leucopus*. *Behav. Biol.* 19:255–260.
- 804 McCarty, R., and C. H. Southwick. 1977b. Patterns of parental care in two Cricetid rodents,  
805 *Onychomys torridus* and *Peromyscus leucopus*. *Anim. Behav.* 25:945–948.
- 806 McGhee, K. E., and A. M. Bell. 2014. Paternal care in a fish: epigenetics and fitness enhancing  
807 effects on offspring anxiety. *Proc. R. Soc. B* 281:20141146.
- 808 McKenna, A., M. Hanna, E. Banks, A. Sivachenko, K. Cibulskis, A. Kernytsky, K. Garimella, D.  
809 Altshuler, S. Gabriel, M. Daly, and M. A. DePristo. 2010. The Genome Analysis Toolkit: a  
810 MapReduce framework for analyzing next-generation DNA sequencing data. *Genome Res.*  
811 20:1297–1303.
- 812 Mckinnon, J. S., S. Mori, B. K. Blackman, L. David, D. M. Kingsley, L. Jamieson, J. Chou, and  
813 D. Schluter. 2004. Evidence for ecology’s role in speciation. *Nature* 429:294–298.
- 814 Mendelson, T. C. 2003. Sexual isolation evolves faster than hybrid inviability in a diverse and

- 815 sexually dimorphic genus of fish (Percidae: *Etheostoma*). *Evolution* 57:317–327.
- 816 Musolf, K., F. Hoffmann, and D. J. Penn. 2010. Ultrasonic courtship vocalizations in wild house  
817 mice, *Mus musculus musculus*. *Anim. Behav.* 79:757–764.
- 818 Noor, M. A. F. 1997. How often does sympatry affect sexual isolation in *Drosophila*? *Am. Nat.*  
819 149:1156–1163.
- 820 Nosil, P. 2007. Divergent host plant adaptation and reproductive isolation between ecotypes of  
821 *Timema cristinae* walking sticks. *Am. Nat.* 169:151–162.
- 822 Nosil, P., R. Riesch, and M. Muschick. 2013. Climate affects geographic variation in host-plant  
823 but not mating preferences of *Timema cristinae* stick-insect populations. *Evol. Ecol. Res.*  
824 15:1–16.
- 825 Ortíz-Barrientos, D., and M. A. F. Noor. 2005. Evidence for a one-allele assortative mating  
826 locus. *Science* 310:1467.
- 827 Patterson, N., A. L. Price, and D. Reich. 2006. Population structure and eigenanalysis. *PLoS*  
828 *Genet.* 2:2074–2093.
- 829 Penn, D., and W. Potts. 1998. MHC-disassortative mating preferences reversed by cross-  
830 fostering. *Proc. R. Soc. B.* 265:1299–306.
- 831 Peterson, B. K., J. N. Weber, E. H. Kay, H. S. Fisher, and H. E. Hoekstra. 2012. Double digest  
832 RADseq: an inexpensive method for *de novo* SNP discovery and genotyping in model and  
833 non-model species. *PLoS One* 7:e37135.
- 834 Pillay, N. 2000. Female mate preference and reproductive isolation in populations of the striped  
835 mouse *Rhabdomys pumilio*. *Behaviour* 137:1431–1441.
- 836 Pomerantz, S. M., A. A. Nunez, and N. J. Bean. 1983. Female behavior is affected by male  
837 ultrasonic vocalizations in house mice. *Physiol. Behav.* 31:91–96.

- 838 Porter, R. H., J. A. Matochik, and J. W. Makin. 1983. Evidence for phenotype matching in spiny  
839 mice (*Acomys Cahirinus*). *Anim. Behav.* 31:978–984.
- 840 Pournelle, G. H. 1952. Reproduction and early post-natal development of the cotton mouse,  
841 *Peromyscus gossypinus*. *J. Mammal.* 33:1–20.
- 842 Price, P. K., and M. L. Kennedy. 1980. Genic relationships in the white-footed mouse,  
843 *Peromyscus leucopus*, and the cotton mouse, *Peromyscus gossypinus*. *Am. Midl. Nat.*  
844 103:73–82.
- 845 Pryke, S. R. 2010. Sex chromosome linkage of mate preference and color signal maintains  
846 assortative mating between interbreeding finch morphs. *Evolution* 64:1301–1310.
- 847 Quadagno, B. Y. D. M., and E. M. Banks. 1970. The effect of reciprocal cross fostering on the  
848 behaviour of two species of rodents, *Mus musculus* and *Baiomys taylori ater*. *Anim. Behav.*  
849 18:379–390.
- 850 Ramsey, J., H. D. Bradshaw, and D. W. Schemske. 2003. Components of reproductive isolation  
851 between the monkeyflowers *Mimulus lewisii* and *M. cardinalis* (Phrymaceae). *Evolution*  
852 57:1520–1534.
- 853 Robbins, L. W., M. H. Smith, M. C. Wooten, and R. K. Selander. 1985. Biochemical  
854 polymorphism and its relationship to chromosomal and morphological variation in  
855 *Peromyscus leucopus* and *Peromyscus gossypinus*. *J. Mammal.* 66:498–510.
- 856 Roehrs, Z. P., J. B. Lack, C. E. S. Jr., C. J. Seiden, R. Bastarache, W. D. Arbour, D. M. L. Jr.,  
857 and R. A. Van Den Bussche. 2012. Mammals of Red Slough Wildlife Management Area,  
858 with comments on McCurtain county, Oklahoma. *Texas Tech Univ. Occas. Pap.* 309:1-24.
- 859 Rolán-Alvarez, E., and A. Caballero. 2000. Estimating sexual selection and sexual isolation  
860 effects from mating frequencies. *Evolution* 54:30–36.

- 861 Sæther, S. A., G.-P. Sætre, T. Borge, C. Wiley, N. Svedin, G. Andersson, T. Veen, J. Haavie, M.  
862 R. Servedio, S. Bures, M. Král, M. B. Hjernquist, L. Gustafsson, J. Träff, and A.  
863 Qvarnström. 2007. Sex chromosome-linked species recognition and evolution of  
864 reproductive isolation in flycatchers. *Science* 318:95–97.
- 865 Schellinck, H. M., A. M. West, and R. E. Brown. 1992. Rats can discriminate between the urine  
866 odors of genetically identical mice maintained on different diets. *Physiol. Behav.* 51:1079–  
867 1082.
- 868 Schug, M. D., S. H. Vessey, and E. M. Underwood. 1992. Paternal behavior in a natural  
869 population of mice (*Peromyscus leucopus*). *Am. Midl. Nat.* 127:373–380.
- 870 Seehausen, O., J. M. van A. Jacques, and F. Witte. 1997. Cichlid fish diversity threatened by  
871 eutrophication that curbs sexual selection. *Science* 277:1808–1811.
- 872 Servedio, M. R., S. a. Sæther, and G.-P. Sætre. 2009. Reinforcement and learning. *Evol. Ecol.*  
873 23:109–123.
- 874 Servedio, M. R., G. S. Van Doorn, M. Kopp, A. M. Frame, and P. Nosil. 2011. Magic traits in  
875 speciation: “magic” but not rare? *Trends Ecol. Evol.* 26:389–397.
- 876 Slagsvold, T., B. T. Hansen, L. E. Johannessen, and J. T. Lifjeld. 2002. Mate choice and  
877 imprinting in birds studied by cross-fostering in the wild. *Proc. R. Soc. B.* 269:1449–1455.
- 878 Smadja, C., and G. Ganem. 1998. Subspecies recognition in the house mouse: a study of two  
879 populations from the border of a hybrid zone. *Behav. Ecol.* 13:312–320.
- 880 Smith, B. A., and M. L. Block. 1991. Male saliva cues and female social choice in Mongolian  
881 gerbils. *Physiol. Behav.* 50:379–384.
- 882 Smith, M. H. 1965. Behavioral discrimination shown by allopatric and sympatric males of  
883 *Peromyscus eremicus* and *Peromyscus californicus* between females of the same two



- 884 species. *Evolution* 19:430–435.
- 885 Soltis, D. E., A. B. Morris, J. S. McLachlan, P. S. Manos, and P. S. Soltis. 2006. Comparative  
886 phylogeography of unglaciated eastern North America. *Mol. Ecol.* 15:4261–4293.
- 887 Talley, H. M., C. M. Laukaitis, and R. C. Karn. 2001. Female preference for male saliva:  
888 implications for sexual isolation of *Mus musculus* subspecies. *Evolution* 55:631–634.
- 889 Taylor, R. J., and H. McCarley. 1963. Vertical distribution of *Peromyscus leucopus* and *P.*  
890 *gossypinus* under experimental conditions. *Southwest. Assoc. Nat.* 8:107–115.
- 891 ten Cate, C., and G. Mug. 1984. The development of mate choice in zebra finch females.  
892 *Behaviour* 90:125–150.
- 893 ten Cate, C., M. N. Verzijden, and E. Etman. 2006. Sexual imprinting can induce sexual  
894 preferences for exaggerated parental traits. *Curr. Biol.* 16:1128–1132.
- 895 ten Cate, C., and D. R. Vos. 1999. Sexual imprinting and evolutionary processes in birds: a  
896 reassessment. Pp. 1–31 in P. J. Slater, J. S. Rosenblatt, C. T. Snowdon, and T. J. Roper, eds.  
897 *Mate Choice*. Academic Press.
- 898 Turner, L. M., D. J. Schwahn, and B. Harr. 2011. Reduced male fertility is common but highly  
899 variable in form and severity in a natural mouse hybrid zone. *Evolution* 66:443–458.
- 900 Verzijden, M. N., R. F. Lachlan, and M. R. Servedio. 2005. Female mate-choice behavior and  
901 sympatric speciation. *Evolution* 59:2097–2108.
- 902 Verzijden, M. N., and G. G. Rosenthal. 2011. Effects of sensory modality on learned mate  
903 preferences in female swordtails. *Anim. Behav.* 82:557–562.
- 904 Verzijden, M. N., and C. ten Cate. 2007. Early learning influences species assortative mating  
905 preferences in Lake Victoria cichlid fish. *Biol. Lett.* 3:134–136.
- 906 Verzijden, M. N., J. Zwinkels, and C. ten Cate. 2009. Cross-fostering does not influence the mate

- 907 preferences and territorial behaviour of males in Lake Victoria cichlids. *Ethology* 115:39–  
908 48.
- 909 Vos, D. R. 1995. Sexual imprinting in zebra-finch females: do females develop a preference for  
910 males that look like their father? *Ethology* 99:252–262.
- 911 Weber, J. N., M. B. Peters, O. V Tsyusko, C. R. Linnen, C. Hagen, N. A. Schable, T. D.  
912 Tuberville, A. M. McKee, S. L. Lance, K. L. Jones, H. S. Fisher, M. J. Dewey, H. E.  
913 Hoekstra, and T. C. Glenn. 2010. Five hundred microsatellite loci for *Peromyscus*. *Conserv.*  
914 *Genet.* 11:1243–1246.
- 915 Wilson, R. C., T. Vacek, D. L. Lanier, and D. A. Dewsbury. 1976. Open-field behavior in  
916 muroid rodents. *Behav. Biol.* 506:495–506.
- 917 Wolfe, J. L., and A. V Linzey. 1977. *Peromyscus gossypinus*. *Mamm. Species* 70:1–5.
- 918 Yamazaki, K., M. Yamaguchi, L. Baranoski, J. Bard, E. A. Boyse, and L. Thomas. 1979.  
919 Recognition among mice. Evidence from the use of a Y-maze differentially scented by  
920 congenic mice of different major histocompatibility types. *J. Exp. Med.* 150:755–760.
- 921 Yukilevich, R., and J. R. True. 2008. Incipient sexual isolation among cosmopolitan *Drosophila*  
922 *melanogaster* populations. *Evolution* 62:2112–2121.

Figure 1

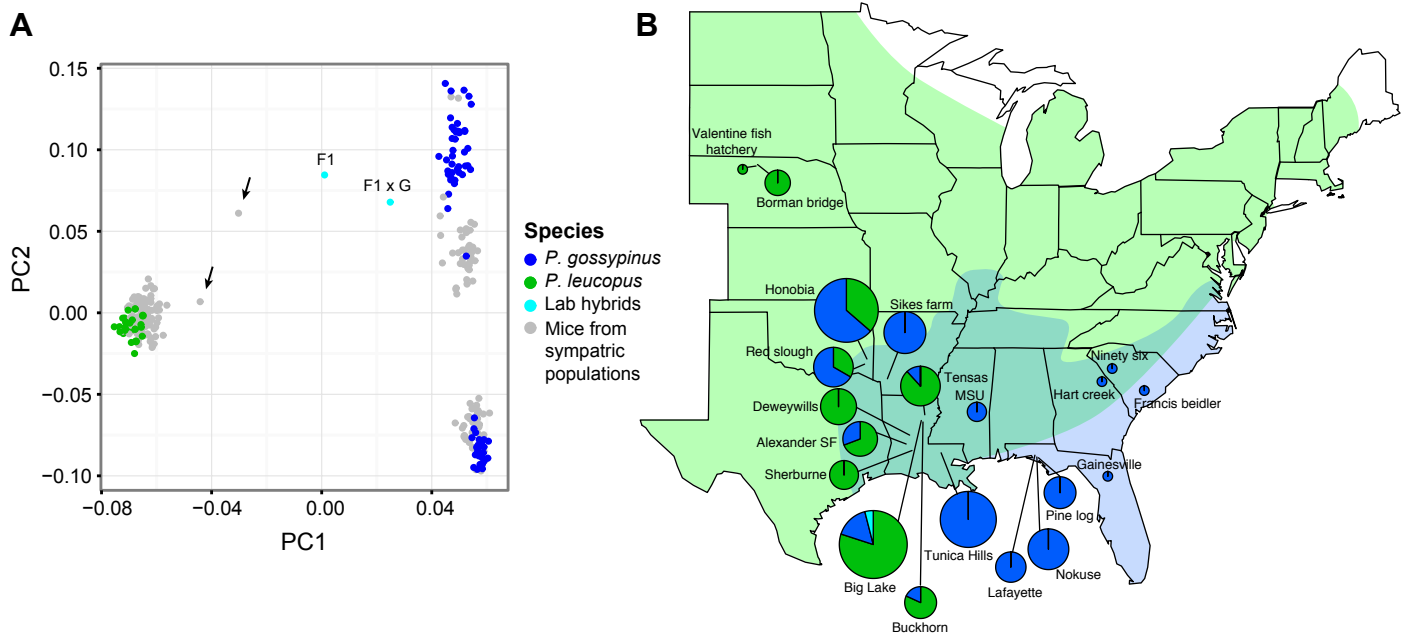

**Figure 1.** Hybridization is extremely rare between sympatric *P. leucopus* and *P. gossypinus* mice. **(A)** Genetic PCA discriminates between species. The first eigenvector strongly separates species based on the values of known allopatric *P. leucopus* (green dots) and *P. gossypinus* (blue dots) mice. The second eigenvector detects population structure among *P. gossypinus* populations that could correspond to mice collected east (higher values) and west (lower values) of the Mississippi river. Known lab-generated F1 and backcross (F1 x *P. gossypinus*) hybrids (cyan dots) fall intermediate along the first eigenvector. Mice collected from the sympatric range overlap (grey dots) cluster discretely with *P. leucopus* or *P. gossypinus* with the exception of two mice that may be hybrids (arrows), but showing greater *P. leucopus* ancestry. **(B)** Range map of the two species: *P. leucopus* (green) and *P. gossypinus* (blue) adapted from (Hall and Kelson 1959; Hall 1981), showing areas of allopatry and sympatry. Pie diagrams show collecting locations and frequencies of each species scaled in size to represent the number of mice sampled at each site. Mice were classified as *P. leucopus* (green dots), *P. gossypinus* (blue dots), or potential hybrids (cyan dots) based on the genetic PCA (shown in **A**). The two possible hybrids were collected at “Big Lake” wildlife management area in Louisiana.

Figure 2

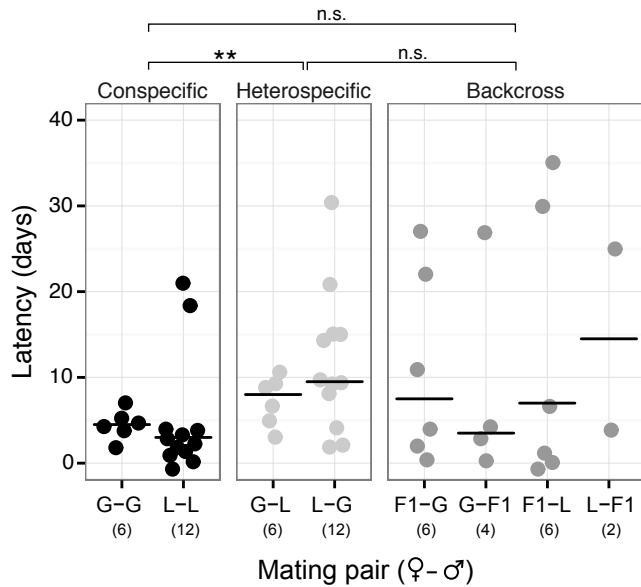

**Figure 2.** Latency to mating between *P. leucopus* (L), *P. gossypinus* (G) and their hybrids (F1). Estimated days since copulation are shown for conspecific, heterospecific, and backcross mating pairs that produced offspring (sample size in parentheses) in no-choice assays. F1 hybrids were generated with both LxG and GxL crosses. In all pairs, female individual is listed first. \*\*  $p = 0.01$ .

Figure 3

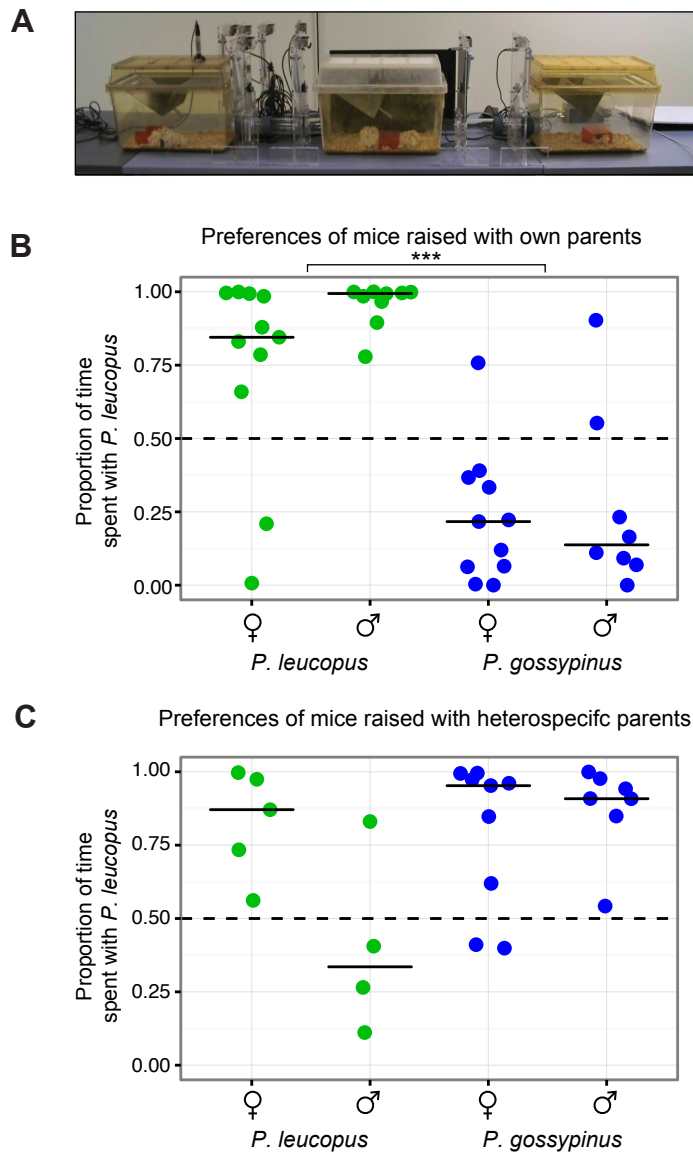

**Figure 3.** Mating preferences in two-way choice trials. **(A)** Photograph of the mate-choice apparatus. Center chamber is connected to two test chambers, each housing a “stimulus” animal, separated by gated doors activated by only the “chooser” animal. **(B)** Mating preferences for mice raised by their own parents. *P. leucopus* spent greater time with *P. leucopus* stimuli than both *P. gossypinus* sexes. **(C)** Mating preferences for mice raised by heterospecific foster parents. *P. leucopus* males were strongly affected cross-fostering ( $p = 0.004$ ), whereas *P. leucopus* females were not (asterisks). Both *P. gossypinus* sexes spent significantly more time with the heterospecific stimulus than when raised by their own parents ( $p < 0.001$ ).

Figure 4

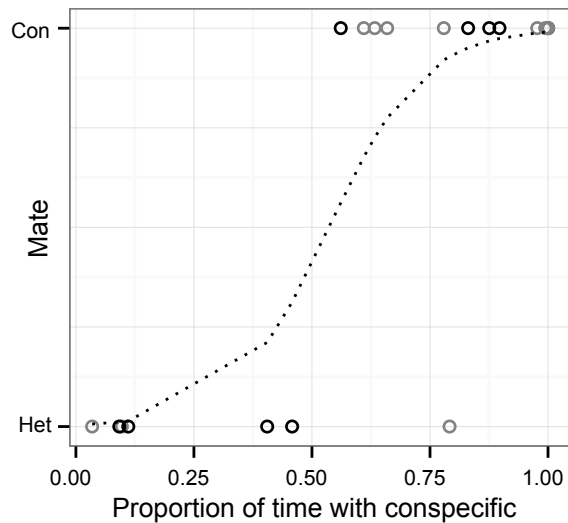

**Figure 4.** The proportion of time spent with a stimulus predicts mating outcome in trials when mating occurred. Mating occurred in 12 trials where choosers were raised with their own parents (gray dots) and 8 trials in where choosers were raised with heterospecific parents (black dots). Dotted line indicates the predicted probability for mate choice (conspecific versus heterospecific) given the proportion of time a chooser spent with a conspecific individual. The proportion of time a chooser individual spent with the conspecific stimulus strongly predicts the mating partner ( $p = 0.038$ ). With the exception of one *P. leucopus* female raised with her own parents, all mice spent more time with their preferred mate.
